# Supplementary material for: Clinical Characteristics and Risk Factors of Delayed Ophthalmoplegia Following Cavernous Sinus Exploration in Endoscopic Skull Base Surgery Delayed transient ophthalmoplegia
Source: Research Square preprint supplement (doi:10.21203/rs.3.rs-7368579/v1), 2025-08-27
Supplement: Supplementary file 1 [file 69e41ae3ef38734a051399a5.pdf]

# Online Resource 4

A Cranial Nerve Dysfunction Distribution (n,%)

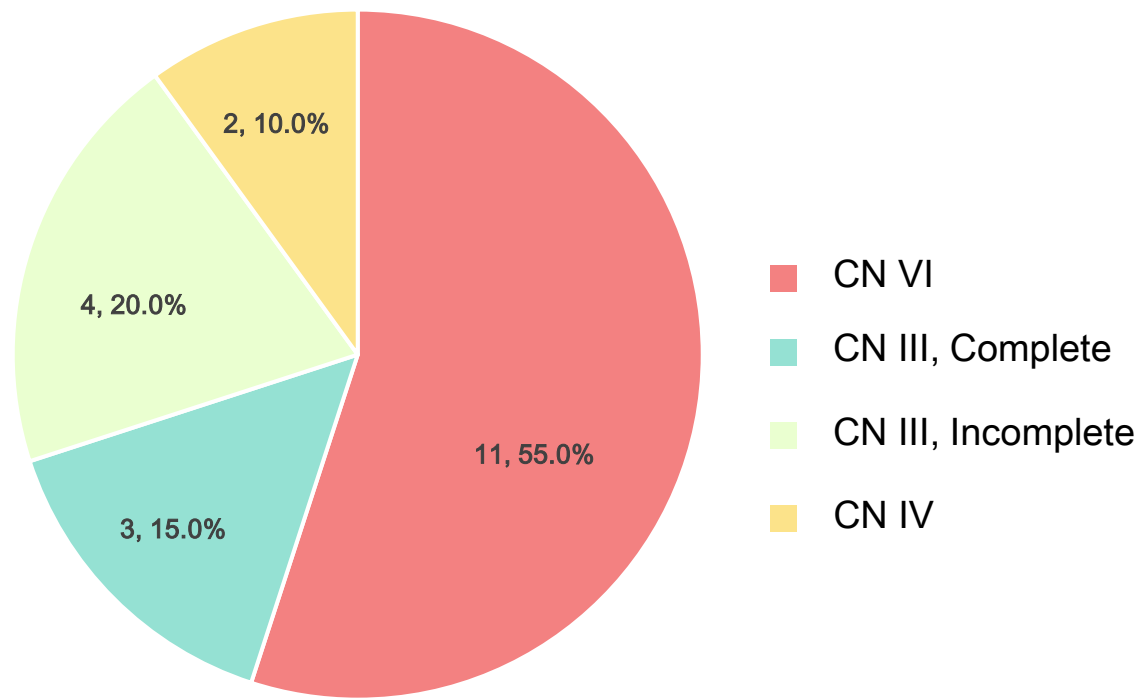

B Cranial Nerve Dysfunction by Compartment (n,%)

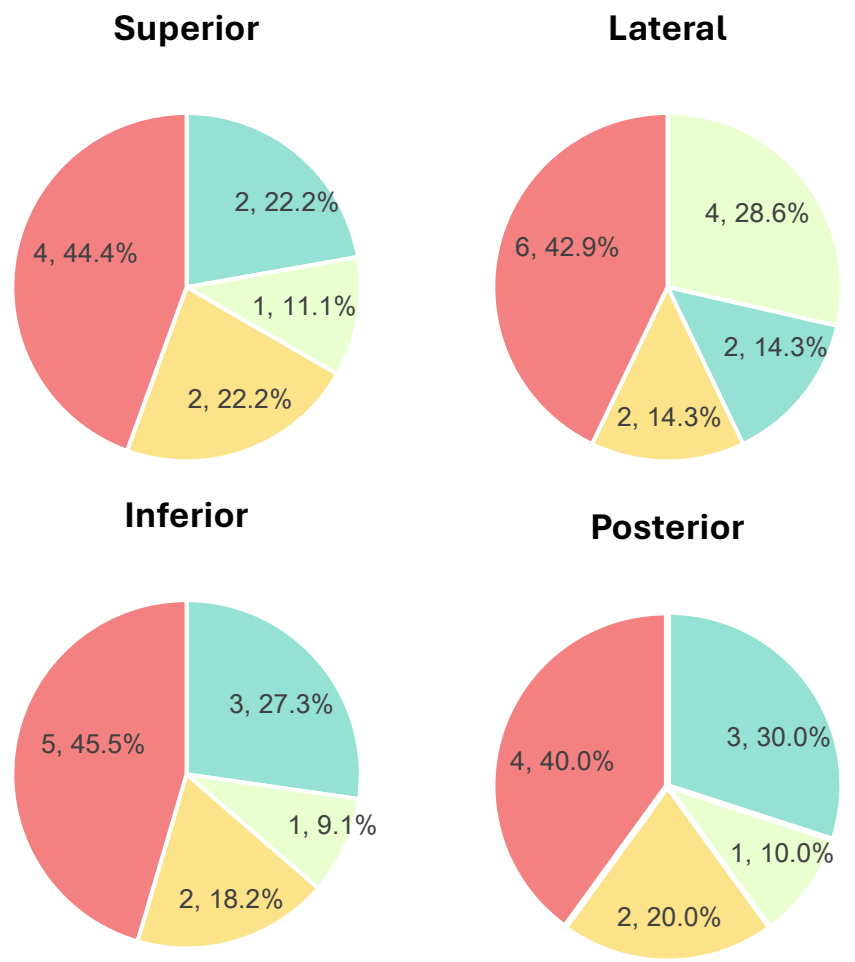

**Panel A.** Overall distribution of affected cranial nerves (n=20 events in 17 patients). Abducens nerve (CN VI) was most frequently affected (11, 55%), followed by incomplete oculomotor nerve palsy (CN III, 4, 20%), complete oculomotor nerve palsy (CN III, 3, 15%), and trochlear nerve palsy (CN IV, 2, 10%).

**Panel B.** Distribution of affected cranial nerves within each cavernous sinus compartment (superior, lateral, inferior, and posterior). Values represent the number and percentage of each nerve type affected within the specific compartment. No statistically significant association was found between cavernous sinus compartment involvement and specific cranial nerve affected (Fisher's exact test,  $p>0.05$ ).
