# Supplementary material for: Clinical Characteristics and Risk Factors of Delayed Ophthalmoplegia Following Cavernous Sinus Exploration in Endoscopic Skull Base Surgery Delayed transient ophthalmoplegia
Source: Research Square preprint supplement (doi:10.21203/rs.3.rs-7368579/v1), 2025-08-27
Supplement: Supplementary file 1 [file f190d5185c174ef8d3cc3d09.docx]

**Online Resource 1.** Post-hoc analysis for significant variables

| Analysis | Variables | p-value | Effect sizea | Power (%) |
| --- | --- | --- | --- | --- |
| Multivariable logistic regressionb | Hemostatic Agent (>2) | <0.001 | 15.57 | **98.2** |
| Lateral Compartment | 0.011 | 9.00 | **99.3** |
| Hypertension (HTN) | 0.054 | 0.18 | **81.8** |
| Subgroup analysisc | Lateral Extension (Midline) | 0.006 | 1.93 | **92.30** |
| Lateral Extension (ICA) | 0.013 | 1.77 | **87.40** |
| Volume | 0.009 | 1.75 | **86.80** |
| Knosp Grade (3-4) | 0.044 | 0.54 | 60.50 |
| Lateral Compartment | 0.044 | 0.54 | 60.50 |
| Posterior Compartment | 0.029 | 0.61 | 70.90 |
| NF vs. F | 0.044 | 0.54 | 60.50 |

a. Effect sizes: Odds ratios (OR) for multivariable logistic regression variables; Cohen's d for continuous variables; Cramer's V for categorical variables.

b. Power for multivariable logistic regression calculated using Monte Carlo simulation (2000 iterations) with actual effect sizes, prevalence rates, and covariate adjustments from the final model.

c. Subgroup analysis power calculated for early vs delayed onset ophthalmoplegia comparison (n=5 vs n=12). Continuous variables analyzed using Wilcoxon rank-sum test with post-hoc power calculated using Cohen's d. Categorical variables analyzed using Chi-square test with post-hoc power calculated using Cramer's V

**Online Resource 2.** Invasion Patterns of Cavernous Sinus Compartments (N=111)a

| **Invasion Pattern** | **Count (Percentage)** |
| --- | --- |
| Sup | 30 (27.0) |
| Inf | 1 (0.9) |
| Post | 2 (1.8) |
| **1 Compartment Subtotal** | **33 (29.7)** |
| Sup-Inf | 8 (7.2) |
| Sup-Lat | 3 (2.7) |
| Sup-Post | 14 (12.6) |
| Lat-Inf | 3 (2.7) |
| Inf-Post | 4 (3.6) |
| **2 Compartment Subtotal** | **32 (28.8)** |
| Sup-Lat-Inf | 7 (6.3) |
| Sup-Lat-Post | 11 (9.9) |
| Lat-Inf-Post | 1 (0.9) |
| **3 Compartment Subtotal** | **19 (17.1)** |
| **4 Compartment Subtotal** | **27 (24.3)** |

a. Bilateral cases (n=3) are counted separately, resulting in 111 patterns from 108 patients with cavernous sinus invasion.

Sup indicates superior compartment; Inf, inferior compartment; Lat, lateral compartment; Post, posterior compartment.

**Online Resource 3. Surgical Outcomes Following Cavernous Sinus Exploration (N=127)**

| **Parameters** | **Non-functioning** **PitNET** | **Functioning PitNET** | **p-value** |
| --- | --- | --- | --- |
| Surgical Parameters | | | |
| GTR | 64 (67.4) | 31 (96.9) | <0.001*** |
| EBL, mL, median (IQR) | 200 (150, 410) | 150 (87.5, 262.5) | 0.020* |
| Adjuvant treatment | 31 (32.6) | 0 (0) | <0.001*** |
| Follow-up | 27.5 (16.7,41.3) | 20.0 (9.7, 24.1) | 0.002** |
| Endocrinological outcome | | | |
| Biochemical remission | - | 31 (96.9) | - |
| Hypopituitarism improvement | 32/84 (38.1) | - | - |
| Visual Outcomes | | | |
| Visual improvementa | 62/74 (83.8) | - |  |
| Complications | | | |
| Epistaxis | 0 (0) | 2 (6.3) | 0.062 |
| CSF leakage | 1 (1.1) | 0 (0) | 1.000 |
| Surgical site infection | 1 (1.1) | 0 (0) | 1.000 |

Data are presented as number (percentage) unless otherwise indicated. Percentages for functioning and non-functioning subgroups are calculated within their respective categories.

a. Visual outcomes were evaluated in patients who have preoperative visual symptoms. For functioning PitNETs, visual outcomes were not evaluated routinely.

PitNET indicates pituitary neuroendocrine tumor; GTR, gross total resection; GKRS, gamma knife radiosurgery; RT,S radiotherapy; CSF, cerebrospinal fluid; SSI, surgical site infection; EBL, estimated blood loss.

**Online Resource 5.** Association Between Cavernous Sinus Compartment Involvement and Specific Cranial Nerve Dysfunctions

| **Compartment** | **CN** | **No (%)** | **Yes (%)** | **p-value** |
| --- | --- | --- | --- | --- |
| **Lateral** | III | 6 (60.0) | 4 (40.0) | 0.650 |
|  | IV | 8 (80.0) | 2 (20.0) | 0.485 |
|  | VI | 6 (60.0) | 4 (40.0) | 0.650 |
| **Superior** | III | 6 (50.0) | 6 (50.0) | 0.384 |
|  | IV | 10 (83.3) | 2 (16.7) | 1 |
|  | VI | 7 (58.3) | 5 (41.7) | 0.294 |
| **Inferior** | III | 5 (62.5) | 3 (37.5) | 1 |
|  | IV | 6 (75.0) | 2 (25.0) | 0.206 |
|  | VI | 5 (62.5) | 3 (37.5) | 0.347 |
| **Posterior** | III | 5 (55.6) | 4 (44.4) | 0.658 |
|  | IV | 7 (77.8) | 2 (22.2) | 0.471 |
|  | VI | 6 (66.7) | 3 (33.3) | 0.153 |

Percentages represent proportion of patients with specific cranial nerve involvement within each compartment. Statistical analysis performed using Fisher exact test.

CN indicates cranial nerve; III, oculomotor nerve; IV, trochlear nerve; VI, abducens nerve.

**Online Resource 6.** Log-Rank Test Results for Factors Potentially Affecting Recovery Time From Postoperative Ophthalmoplegia

| **Variable** | **Chi-square** | **df** | **p-value** |
| --- | --- | --- | --- |
| Age (High vs Low) | 1.3 | 1 | 0.200 |
| Sex (Male vs Female) | 0.1 | 1 | 0.700 |
| BMI (High vs Low) | 2.1 | 1 | 0.100 |
| HTN | 0.8 | 1 | 0.400 |
| DM | 0.0 | 1 | 1.000 |
| Smoking status | 4.7 | 2 | 0.100 |
| Coagulopathy | 0.1 | 1 | 0.700 |
| Postoperative coagulopathy | 0.1 | 1 | 0.800 |
| Knosp grade (0-2 vs 3-4) | 0.7 | 1 | 0.400 |
| Tumor volume (High vs Low) | 2.0 | 1 | 0.200 |
| Ki-67 index (High vs Low) | 2.0 | 1 | 0.200 |
| Functioning type | 1.3 | 3 | 0.700 |
| Compartmental Involvement |  |  |  |
| Superior compartment | 0.4 | 1 | 0.500 |
| Inferior compartment | 0.1 | 1 | 0.700 |
| Lateral compartment | 1.4 | 1 | 0.200 |
| Posterior compartment | 1.6 | 1 | 0.200 |
| Lateral extension |  |  |  |
| From medial wall of proximal cavernous ICA (High vs Low) | 0.7 | 1 | 0.400 |
| From midline (High vs Low) | 2.0 | 1 | 0.200 |
| OMC grade | 1.1 | 2 | 0.600 |
| GTR | 0.1 | 1 | 0.800 |
| Revision surgery | 2.8 | 1 | 0.090 |
| Postoperative hematoma | 0.1 | 1 | 0.800 |
| Hemostatic agent (>2 ea vs 1-2 ea) | 21.9 | 1 | **<0.001*** |
| Ophthalmalgia | 4.8 | 1 | **0.030*** |

High vs low categories for continuous variables were determined by median split. Significant associations (P < .05) are shown in bold.

df indicates degrees of freedom; BMI, body mass index; HTN, hypertension; DM, diabetes mellitus; ICA, internal carotid artery; GTR, gross total resection.

**Online Resource 7.** Restricted Mean Survival Time (RMST) result for symptom duration

| **Variable** |  | **Tau (Days)** | | | |
| --- | --- | --- | --- | --- | --- |
|  |  | **100** | **300** | **500** | **700** |
| **Hemostatic agent** | RMST difference (95% CI) | **36.15 (17.32, 54.99)** | **73.24 (17.48, 129.00)** | **89.90 (10.26, 169.55)** | 106.57 (-0.71, 213.85) |
|  | p-value | **0.0002*** | **0.0100*** | **0.0269*** | 0.0515 |
| **Ophthalmalgia** | RMST difference (95% CI) | **54.12 (15.41, 92.82)** | **183.48 (65.91, 301.05)** | **258.48 (58.11, 458.85)** | **333.48 (30.69, 636.28)** |
|  | p-value | **0.0061*** | **0.0022*** | **0.0115*** | **0.0309*** |
| **EBL** | RMST difference (95% CI) | 10.29 (-10.52, 31.10) | 44.52 (-10.74, 99.78) | 59.90 (-17.46, 137.27) | 75.29 (-27.65, 178.23) |
|  | p-value | 0.3325 | 0.1143 | 0.1291 | 0.1517 |

RMST difference represents the difference in expected symptom duration (in days) between groups at specific time points. Positive values indicate longer duration in the comparison group. EBL indicates estimated blood loss. EBL violated the proportional hazards assumption by Schoenfeld test. It was evaluated by RMST. (p<0.005)

RMST indicates restricted mean survival time; CI, confidence interval; EBL, estimated blood loss.

Significant association (P < 0.05) was represented by bold font style. Statistical significance is indicated by: *p<0.05, **p<0.01, ***p<0.001.

**Online Resource 8.** Correlation Analysis for Three Key Variables

|  | **Hemostat Agent** | **Lateral Compartment** | **HTN** |
| --- | --- | --- | --- |
| **Age** | 1 | 0.23* | **0.30**** |
| **BMI** | 0.07 | 1 | 0.22* |
| **Ki-67** | 0.24* | 0.11 | 1 |
| **Volume** | 0.32** | **0.53***** | 0.09 |
| **EBL** | 0.06 | 0.28** | 0.05 |
| **Lateral Extension (ICA)** | 0.19 | **0.78***** | 0.19 |
| **Lateral Extension (Midline)** | 0.31** | **0.69***** | 0.02 |
| **Functioning** | **0.49***** | **0.35***** | 0.26* |
| **OMC Grade** | 0.17 | **0.57***** | 0.09 |
| **Hemostat Agent** | 1 | 0.09 | 0.07 |
| **Lateral Compartment** | 0.09 | 1 | 0.11 |
| **Superior Compartment** | 0.13 | **0.28**** | 0.08 |
| **Inferior Compartment** | 0.13 | **0.60***** | 0.01 |
| **Posterior Compartment** | 0.13 | **0.51***** | 0.14 |
| **Knosp Grade** | 0.23* | 0.48*** | 0.02 |
| **Sex** | 0.18 | 0.16 | 0.09 |
| **HTN** | 0.07 | 0.11 | 1 |
| **DM** | 0.02 | 0.02 | 0.06 |
| **Ophthalmoplegia** | **0.49***** | **0.33***** | 0.05 |

The analysis specifically examined three key variables (Hemostatic agent usage, Lateral compartment involvement, and Hypertension) and their relationships with other patient characteristics. Standardized continuous variables were used to facilitate comparison across different measurement scales.

Nonparametric correlation analysis of key clinical variables. Values represent correlation coefficients calculated using nonparametric methods. For continuous-continuous variable pairs, Spearman's rank correlation was used. For binary-continuous variable pairs, rank-biserial correlation coefficients were derived from Mann-Whitney U tests. For multi-categorical-continuous variable pairs, the square root of epsilon squared from Kruskal-Wallis tests was used as correlation estimate. For categorical-categorical variable pairs, Cramer's V was calculated.

Correlation index (r>0.3) was represented by bold font style. Statistical significance is indicated by: *p<0.05, **p<0.01, ***p<0.001.
